# Supplementary material for: Weight-loss-independent benefits of exercise on liver steatosis and stiffness in Japanese men with NAFLD
Source: PubMed Central journal article supplement (PMC8059085; doi:10.1016/j.jhepr.2021.100253), 2021-02-10
Supplement: mmc1.pdf [file mmc1.pdf]

# **Weight loss-independent benefits of exercise on liver steatosis and stiffness in Japanese men with NAFLD**

Sechang Oh, Takehiko Tsujimoto, Bokun Kim, Fumihiko Uchida, Hideo Suzuki, Seiichiro Iizumi, Tomonori Isobe, Takeji Sakae, Kiyoji Tanaka, Junichi Shoda

## Table of contents

|                                  |    |
|----------------------------------|----|
| Supplementary methods.....       | 2  |
| Supplementary results.....       | 6  |
| Supplementary figure legend..... | 11 |
| Fig. S1.....                     | 12 |
| Table S1.....                    | 13 |
| Table S2.....                    | 15 |
| Table S3.....                    | 16 |
| Table S4.....                    | 17 |
| Table S5.....                    | 18 |

## **Supplementary methods**

### **Table S1**

#### ***Group classification***

The E<sub>sub</sub> group was divided into two subgroups: a group that undertook a large amount of exercise (E<sub>large</sub>, n = 12) and a group that undertook a small amount of exercise (E<sub>small</sub>, n = 12), so that we could determine whether the amount of moderate-to-vigorous-intensity physical activity (MVPA) performed had a bearing on the benefits of exercise. This would permit us to suggest the optimal amount of exercise that would be required to achieve clinical improvement.

#### ***Attendance rate***

There were 12 dietary restriction classes for participants in the weight-loss groups and 36 exercise classes for participants in the exercise groups. We calculated the number of classes each participant attended as a percentage.

#### ***Analysis of physical activity***

To evaluate the daily amount and intensity of exercise, participants wore a single-axis accelerometer (Lifecorder; Suzuken Co Ltd, Nagoya, Japan) during their periods of activity from 2 weeks prior to the start of the intervention until the end of the intervention period. We used the MVPA volume to divide subjects (n=24) as “large” (n=12) and “small” (n=12) amounts of exercise.

#### ***Statistics***

Statistical analysis was conducted using SPSS ver. 25.0 (IBM Corp, Armonk, NY, USA). The results are presented as means (SEMs) for the raw data. To characterize intra-group changes over time, dependent variables were analyzed using Wilcoxon's rank sum test. Differences between groups were identified using the Mann-Whitney U-test. Finally, when data were adjusted for baseline values, ranked analyses of covariance (ANCOVA) was conducted. All tests were two-sided and statistical significance was accepted at  $P < 0.05$ .

## **Table S5**

### ***Statistics***

Statistical analysis was conducted using SPSS ver. 25.0 (IBM Corp). A multivariate linear regression model was constructed using stepwise selection that considered all the variables that were significant in univariate analyses. Statistical significance was accepted at  $P < 0.05$ .

**Fig. S1**

*Isometric leg muscle strength*

Maximal strength of the isometric contraction of knee extension was measured using a Biodex III dynamometer (Biodex Medical Systems Inc., Shirley, NY, USA). The participants performed a warm-up with professional trainers before the test, and then were seated and tightly secured using chest, pelvic, and thigh straps, with their backs supported at an angle of 120°. The knee was extended at an angle of 60° for the isometric assessment. The peak torque (Nm) of three maximal extension efforts was determined as the maximal strength. Each isometric contraction was held for 3 seconds, with intervening 15-second pauses. The results were reported as absolute values (Nm) and normalized body weight (Nm/kg). These methods have been previously described in detail (Kim, B. et al. Changes in muscle strength after diet-induced weight reduction in adult men with obesity: a prospective study. *Diabetes Metab Syndr Obes* 10, 187–194 2017)

## **Supplementary results**

### **Table S1**

#### ***Baseline analysis***

The age, attendance rate, and anthropometric characteristics of the groups did not significantly differ. However, there were significant differences in the AST activity and FAST-Score between the  $E_{\text{large}}$  and  $E_{\text{small}}$  groups. These data were analyzed with adjustment for baseline values.

#### ***Dietary intake***

The intakes of total energy, carbohydrate, protein, and fat did not significantly change in either the  $E_{\text{large}}$  or  $E_{\text{small}}$  groups during the intervention. The magnitudes of these changes did not differ between the  $E_{\text{large}}$  and  $E_{\text{small}}$  groups.

#### ***Physical activity***

The amount of MVPA and the number of steps taken increased significantly in both the  $E_{\text{large}}$  and  $E_{\text{small}}$  groups during the intervention, but the amount of low-intensity physical activity did not change. The magnitudes of the increases in the MVPA and the number of steps taken were greater in the  $E_{\text{large}}$  group than in the  $E_{\text{small}}$  group.

#### ***Anthropometric characteristics***

The lean mass did not change in either the  $E_{\text{large}}$  or  $E_{\text{small}}$  groups, but other parameters significantly decreased in the  $E_{\text{large}}$  group, and WC and fat mass decreased in the  $E_{\text{small}}$  group during the intervention. The magnitudes of the changes in these parameters did not significantly differ between the groups.

#### ***Liver enzyme activities:***

The activities of all three enzymes (AST, ALT, and  $\gamma$ -GT) in the E<sub>large</sub> group significantly decreased during the intervention. However, there were no significant changes in the E<sub>small</sub> group. Comparisons of the E<sub>large</sub> and E<sub>small</sub> groups revealed that the magnitude of the change in  $\gamma$ -GT activity was greater in the E<sub>large</sub> group than in the E<sub>small</sub> group.

### ***Surrogate markers of NASH and fibrosis***

The FAST-Score decreased in the E<sub>large</sub> group, but not in the E<sub>small</sub> group during the intervention. There were no significant changes in FIB-4 index or NF-Score during the intervention period in any of the groups.

Comparisons between the E<sub>large</sub> and E<sub>small</sub> groups revealed that the magnitude of the decrease in the FAST-Score was greater in the E<sub>large</sub> group than in the E<sub>small</sub> group. However, for the FIB-4 index and NF-Score, there were no significant differences.

### ***Biochemical markers of NASH and fibrosis***

TBARS did not significantly change in either the E<sub>large</sub> or E<sub>small</sub> groups, but other parameters (ferritin, M30, and WFA<sup>+</sup>-M2BP) decreased in both the E<sub>large</sub> and E<sub>small</sub> groups during the intervention. The magnitudes of these decreases did not differ between the E<sub>large</sub> and E<sub>small</sub> groups.

### ***Insulin resistance and lipid profile***

In the E<sub>small</sub> group, only FPG showed a significant decrease, and HOMA-IR and NEFA showed decreases in the E<sub>large</sub> group. However, there were not significant differences in the changes in the E<sub>large</sub> and E<sub>small</sub> groups.

### ***Liver stiffness, steatosis, and KC phagocytosis***

The liver steatosis and stiffness of both the  $E_{\text{large}}$  and  $E_{\text{small}}$  groups significantly decreased during the intervention. KC phagocytosis decreased in the  $E_{\text{large}}$  group, but not in the  $E_{\text{small}}$  group.

Comparisons between the  $E_{\text{large}}$  and  $E_{\text{small}}$  groups revealed that the magnitude of the decrease in liver steatosis was greater in the  $E_{\text{large}}$  group than in the  $E_{\text{small}}$  group. However, there were no significant differences in the changes in the liver stiffness and KC phagocytosis between the groups.

### ***Organokines***

Of the 12 organokines assessed, five (Se-P, FGF-21, follistatin, myostatin, and leptin) in the  $E_{\text{large}}$  group and eight (Se-P, follistatin, ANGPTL6, myostatin, SPARC, leptin, adiponectin, and IL-6) in the  $E_{\text{small}}$  group significantly changed during the intervention.

Comparisons between the  $E_{\text{large}}$  and  $E_{\text{small}}$  groups revealed that the magnitudes of changes in the FGF-21, myostatin, and leptin concentrations were greater in the  $E_{\text{large}}$  group than in the  $E_{\text{small}}$  group.

### ***Nrf2 target gene expression***

In the  $E_{\text{large}}$  group, there were significant increases in catalase, *GCLM*, and *NQO1* expression levels; and in the  $E_{\text{small}}$  group, increases in catalase, *GCLM*, and *mnSOD* levels were found during the intervention. There were no significant differences in the magnitudes of the changes between the  $E_{\text{large}}$  and  $E_{\text{small}}$  groups.



## **Table S5**

Multiple regression analysis was performed using the reduction in liver steatosis, as the dependent variable, to identify the pathophysiological factors associated with exercise. Only the increase in MVPA was found to independently influence the reduction in liver steatosis. In addition, multiple regression analysis was performed using the reduction in liver stiffness, which reflects the reduction in liver fibrosis and/or inflammation, as the dependent variable, to identify the pathophysiological factors associated with exercise. Only the reduction in liver steatosis was found to independently affect the reduction in liver stiffness. These findings demonstrate that the increase in MVPA achieved using the exercise regimen was an effective means of reducing both fat storage and stiffness in the liver.

**Fig. S1**

Absolute values (Nm) and body weight-normalized (Nm/kg) isometric leg muscle strength were significantly increased in the E<sub>sub</sub> group during the intervention, but not in the W<sub>sub</sub> group.

Comparisons between the E<sub>sub</sub> and W<sub>sub</sub> groups revealed that the absolute values (Nm) and normalized body weight (Nm/kg) isometric leg muscle strength significantly differed.

## Supplementary figure legends

**Fig. S1. Changes in isometric leg muscle strength between baseline and the 3-month end-point in patients with NAFLD who participated in an exercise regimen ( $E_{\text{sub}} = 24$ ) or a weight-loss regimen ( $W_{\text{sub}} = 21$ )**

The dark grey bars represent  $E_{\text{sub}}$  and the light gray bars represent  $W_{\text{sub}}$  (means  $\pm$  SEMs).  $\dagger\dagger P < 0.01$ ,  $\dagger P < 0.05$ : significant differences between baseline and month 3;  $**P < 0.01$ ,  $*P < 0.05$ : significant differences between the groups.

**Fig. S1**

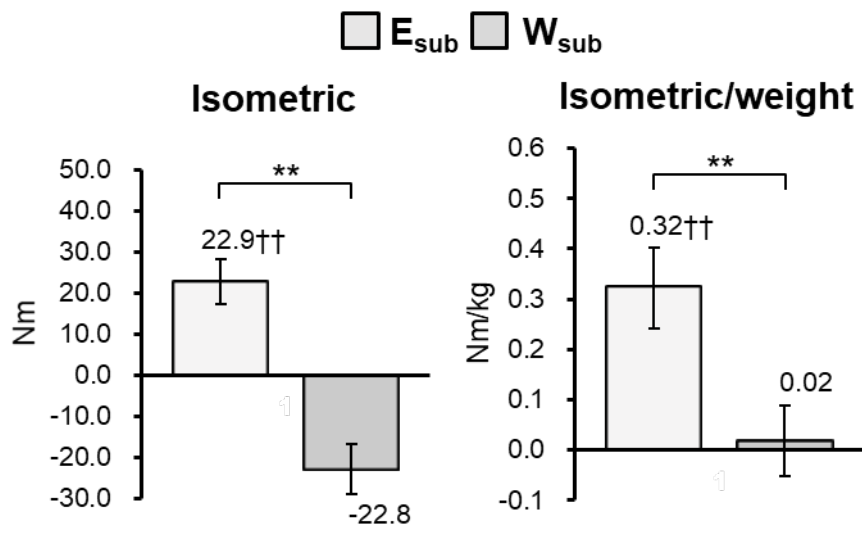

**Table S1. Outcomes of subgroups in 24 obese men with NAFLD who participated in an exercise regimen and undertook either a large amount or ( $E_{large}$ ) or a small amount ( $E_{small}$ ) of moderate-to-vigorous physical activity**

| Parameter                                       | $E_{large}$ [ $E_L$ ] |                 |            | $E_{small}$ [ $E_S$ ] |                 |           | $E_L$ vs. $E_S$<br><i>P</i> |
|-------------------------------------------------|-----------------------|-----------------|------------|-----------------------|-----------------|-----------|-----------------------------|
|                                                 | Baseline              | After           | Change     | Baseline              | After           | Change    |                             |
| n                                               |                       | 12              |            |                       | 12              |           |                             |
| Age, years                                      |                       | 50.7 (2.0)      |            |                       | 48.7 (2.2)      |           | 0.504                       |
| Attendance, %                                   |                       | 85.4 (2.2)      |            |                       | 86.1 (2.0)      |           | 0.817                       |
| <b>Physical Activity</b>                        |                       |                 |            |                       |                 |           |                             |
| MVPA, min·d <sup>-1</sup>                       | 44.1 (4.6)            | 89.7 (6.4)      | +45.6**    | 49.1 (4.6)            | 59.8 (6.4)      | +10.8**   | $E_L > E_S$ **              |
| LPA, min·d <sup>-1</sup>                        | 231.9 (20.4)          | 242.9 (17.0)    | +10.9      | 265.0 (14.6)          | 245.4 (10.1)    | -19.6     | 0.068                       |
| Steps·d <sup>-1</sup>                           | 5,946.9 (6179)        | 11,070.5 (840)  | +5,123.6** | 7,418.0 (546)         | 8,954.0 (766)   | +1,536.0* | $E_L > E_S$ **              |
| <b>Daily Dietary Intake</b>                     |                       |                 |            |                       |                 |           |                             |
| TEI, kcal·d <sup>-1</sup>                       | 2,135.0 (146.1)       | 2,144.4 (142.8) | +9.3       | 2,253.5 (74.4)        | 2,200.3 (125.8) | -53.2     | 0.713                       |
| Carbohydrate, g·d <sup>-1</sup>                 | 280.3 (13.9)          | 286.1 (15.2)    | +5.8       | 267.7 (12.5)          | 260.0 (14.6)    | -7.8      | 0.478                       |
| *Protein, g·d <sup>-1</sup>                     | 77.5 (8.9)            | 70.8 (4.4)      | -6.7       | 82.0 (3.3)            | 75.0 (4.0)      | -7.0      | 0.671                       |
| Fat, g·d <sup>-1</sup>                          | 61.6 (4.6)            | 51.5 (2.8)      | -10.1      | 74.9 (4.8)            | 66.7 (4.5)      | -8.1      | 0.977                       |
| <b>Anthropometric Characteristics</b>           |                       |                 |            |                       |                 |           |                             |
| Body Weight, kg                                 | 83.5 (2.5)            | 81.3 (2.5)      | -2.2**     | 83.1 (2.7)            | 81.8 (3.0)      | -1.2      | 0.514                       |
| BMI, kg·m <sup>-2</sup>                         | 28.5 (0.7)            | 27.8 (0.7)      | -0.8**     | 27.7 (0.7)            | 27.3 (0.8)      | -0.4      | 0.478                       |
| WC, cm                                          | 98.6 (1.9)            | 94.8 (1.5)      | -3.8**     | 96.8 (2.0)            | 93.9 (2.6)      | -2.9**    | 0.319                       |
| Fat Mass, kg                                    | 21.7 (1.5)            | 20.0 (1.3)      | -1.7**     | 20.9 (1.4)            | 19.9 (1.6)      | -1.0*     | 1.000                       |
| Lean Mass, kg                                   | 61.8 (1.5)            | 61.3 (1.6)      | -0.5       | 62.1 (1.8)            | 61.9 (1.8)      | -0.2      | 0.410                       |
| <b>Hepatic Parameters</b>                       |                       |                 |            |                       |                 |           |                             |
| Liver Steatosis, dB·m <sup>-1</sup>             | 297.0 (15.7)          | 230.1 (10.4)    | -66.9**    | 266.9 (9.7)           | 237.7 (14.5)    | -29.3**   | $E_L > E_S$ *               |
| Liver Stiffness, kPa                            | 5.76 (0.36)           | 4.84 (0.30)     | -0.92**    | 5.39 (0.29)           | 4.56 (0.21)     | -0.83**   | 0.663                       |
| KC phagocytosis, dB·m <sup>-1</sup>             | 135.7 (8.7)           | 149.3 (9.8)     | +13.6*     | 128.5 (14.2)          | 150.2 (6.3)     | +21.7     | 0.730                       |
| <b>Liver Enzyme Activities</b>                  |                       |                 |            |                       |                 |           |                             |
| *AST, U·L <sup>-1</sup>                         | 26.9 (2.2)            | 23.2 (1.0)      | -3.7*      | 20.3 (1.4)            | 21.0 (1.6)      | +0.7      | $E_L > E_S$ *               |
| ALT, U·L <sup>-1</sup>                          | 33.7 (4.4)            | 26.9 (2.7)      | -6.8*      | 24.8 (2.8)            | 24.3 (2.5)      | -0.6      | $E_L > E_S$ *               |
| γ-GT, U·L <sup>-1</sup>                         | 53.3 (10.5)           | 46.5 (8.4)      | -6.8*      | 46.3 (10.7)           | 46.6 (8.4)      | +0.3      | $E_L > E_S$ *               |
| <b>Biochemical markers of NASH and Fibrosis</b> |                       |                 |            |                       |                 |           |                             |
| Ferritin, μg·L <sup>-1</sup>                    | 133.1 (22.2)          | 101.5 (18.1)    | -31.6**    | 168.6 (26.7)          | 133.0 (20.9)    | -35.6**   | 0.590                       |
| TBARS, μM·L <sup>-1</sup>                       | 20.7 (1.6)            | 18.0 (1.3)      | -2.7       | 18.5 (1.3)            | 16.3 (0.6)      | -2.1      | 0.379                       |
| M30, U·L <sup>-1</sup>                          | 283.5 (70.6)          | 200.2 (39.8)    | -83.3**    | 204.8 (24.8)          | 177.5 (23.7)    | -27.3*    | 0.932                       |
| WFA <sup>+</sup> -M2BP, ng·mL <sup>-1</sup>     | 0.40 (0.05)           | 0.17 (0.03)     | -0.2**     | 0.35 (0.05)           | 0.12 (0.03)     | -0.2**    | 0.755                       |
| <b>Surrogate Markers of NASH and Fibrosis</b>   |                       |                 |            |                       |                 |           |                             |
| FAST-Score                                      | 0.202 (0.039)         | 0.093 (0.016)   | -0.109**   | 0.089 (0.022)         | 0.081 (0.025)   | -0.007    | $E_L > E_S$ *               |
| FIB-4 index                                     | 0.915 (0.06)          | 0.880 (0.037)   | -0.035     | 0.885 (0.098)         | 0.891 (0.082)   | +0.006    | 0.465                       |
| NF-Score                                        | -2.413 (0.261)        | -2.630 (0.180)  | -0.217     | -2.293 (0.326)        | -2.498 (0.310)  | -0.206    | 0.973                       |
| <b>Adipokines</b>                               |                       |                 |            |                       |                 |           |                             |
| Leptin, pg·L <sup>-1</sup>                      | 8.57 (1.06)           | 5.72 (0.80)     | -2.85*     | 7.38 (0.98)           | 6.21 (0.96)     | -1.17*    | $E_L > E_S$ *               |
| Adiponectin, ng·L <sup>-1</sup>                 | 3.58 (0.35)           | 3.83 (0.51)     | +0.25      | 4.10 (0.62)           | 4.53 (0.73)     | +0.43*    | 0.378                       |
| IL-6, pg·mL <sup>-1</sup>                       | 1.43 (0.23)           | 1.32 (0.34)     | -0.11      | 2.49 (0.82)           | 0.81 (0.20)     | -1.68*    | 0.061                       |
| <b>Hepatokines</b>                              |                       |                 |            |                       |                 |           |                             |
| Se-P, ng·L <sup>-1</sup>                        | 7.06 (0.65)           | 6.18 (0.66)     | -0.88**    | 8.03 (0.83)           | 7.23 (0.78)     | -0.81*    | 0.928                       |
| FGF-21, pg·mL <sup>-1</sup>                     | 229.8 (53.3)          | 282.2 (64.0)    | +52.4*     | 327.4 (55.5)          | 253.4 (41.0)    | -74.0     | $E_L > E_S$ **              |
| Follistatin, ng·mL <sup>-1</sup>                | 7.1 (0.2)             | 8.5 (0.5)       | +1.4**     | 7.0 (0.2)             | 7.9 (0.4)       | +0.9**    | 0.519                       |
| ANGPTL6, ng·mL <sup>-1</sup>                    | 64.2 (4.7)            | 82.9 (9.8)      | +18.7      | 67.5 (4.1)            | 96.1 (11.4)     | +28.4**   | 0.332                       |
| Fetuin-A, ng·L <sup>-1</sup>                    | 288.9 (18.4)          | 274.5 (15.6)    | -14.4      | 264.9 (12.4)          | 278.9 (14.9)    | +14.1     | 0.132                       |
| <b>Myokines</b>                                 |                       |                 |            |                       |                 |           |                             |
| Myostatin, pg·mL <sup>-1</sup>                  | 14.7 (2.2)            | 10.4 (1.7)      | -4.3**     | 12.8 (1.7)            | 11.2 (1.9)      | -1.6*     | $E_L > E_S$ **              |
| SPARC, ng·L <sup>-1</sup>                       | 1.14 (0.16)           | 1.08 (0.15)     | -0.06      | 1.06 (0.15)           | 0.97 (0.13)     | -0.09*    | 0.429                       |
| Decorin, ng·mL <sup>-1</sup>                    | 3.76 (0.36)           | 3.87 (0.23)     | 0.11       | 3.92 (0.20)           | 3.86 (0.24)     | -0.06     | 0.577                       |
| BDNF, ng·mL <sup>-1</sup>                       | 2.7 (0.1)             | 3.3 (0.3)       | +0.6       | 2.7 (0.2)             | 3.1 (0.3)       | +0.4      | 0.699                       |
| <b>Insulin Resistance and Lipid Profile</b>     |                       |                 |            |                       |                 |           |                             |
| FPG, mg·dL <sup>-1</sup>                        | 96.8 (3.1)            | 94.3 (2.0)      | -2.5       | 102.8 (5.0)           | 97.8 (5.1)      | -5.0*     | 0.242                       |
| HOMA-IR                                         | 3.4 (0.6)             | 2.7 (0.5)       | -0.7*      | 2.2 (0.3)             | 1.8 (0.3)       | -0.5      | 0.799                       |
| TG, mg·dL <sup>-1</sup>                         | 156.9 (26.6)          | 150.2 (32.8)    | -6.8       | 112.4 (20.7)          | 91.0 (10.2)     | -21.4     | 0.799                       |
| *NEFA, Eq·L <sup>-1</sup>                       | 0.58 (0.06)           | 0.46 (0.06)     | -0.1*      | 0.61 (0.06)           | 0.55 (0.05)     | -0.1      | 0.242                       |
| <b>Nrf2 Target Gene Expression</b>              |                       |                 |            |                       |                 |           |                             |
| Catalase                                        | 0.659 (0.09)          | 2.121 (0.57)    | +1.462*    | 0.5309 (0.07)         | 1.357 (0.34)    | +0.826*   | 0.331                       |
| GPX2                                            | 0.034 (0.01)          | 0.038 (0.01)    | +0.005     | 0.021 (0.010)         | 0.036 (0.010)   | +0.015    | 0.552                       |
| HO1                                             | 0.509 (0.2)           | 0.572 (0.2)     | +0.062     | 0.325 (0.050)         | 0.482 (0.100)   | +0.156    | 0.566                       |
| GCLM                                            | 0.082 (0.02)          | 0.137 (0.04)    | +0.055*    | 0.077 (0.04)          | 0.138 (0.03)    | +0.060*   | 0.487                       |
| mnSOD                                           | 83.8 (10.4)           | 97.3 (23.5)     | +13.5      | 71.6 (6.5)            | 101.6 (14.0)    | +30.0*    | 0.190                       |
| NQO1                                            | 1.068 (0.88)          | 4.981 (3.51)    | +3.912*    | 0.332 (0.2)           | 0.515 (0.21)    | +0.182    | 0.074                       |

|             |               |             |        |               |               |        |       |
|-------------|---------------|-------------|--------|---------------|---------------|--------|-------|
| <i>GCLC</i> | 4.869 (0.644) | 5.26 (0.54) | +0.395 | 5.048 (0.476) | 5.012 (0.454) | -0.036 | 0.905 |
|-------------|---------------|-------------|--------|---------------|---------------|--------|-------|

Means (SEMs). Significant differences: \* $P < 0.05$ ; \*\* $P < 0.01$ . Within-group changes over time, between baseline and 3 months, for all dependent variables were analyzed using Wilcoxon's rank sum test. Mann-Whitney U tests or <sup>a</sup>ranked analyses of covariance (ANCOVA), with adjustments for baseline data, were used to compare the changes between groups. **LPA**, light physical activity; **TEI**, total energy intake; **BMI**, body mass index; **WC**, waist circumference; **AST**, aspartate transaminase; **ALT**, alanine aminotransferase;  **$\gamma$ -GT**, gamma-glutamyl transpeptidase; **TBARS**, thiobarbituric acid-reactive substances; **WFA<sup>+</sup>-M2BP**, *Wisteria floribunda* agglutinin-positive human Mac-2-binding protein; **FAST-Score**, FibroScan-AST Score; **NF-Score**, NAFLD fibrosis score; **IL-6**, interleukin 6; **Se-P**, selenoprotein-P; **FGF-21**, fibroblast growth factor 21; **ANGPTL6**, angiopoietin-like 6; **SPARC**, secreted protein acidic and rich in cysteine; **BDNF**, brain-derived neurotrophic factor; **FPG**, fasting plasma glucose; **HOMA-IR**, homeostatic model assessment-insulin resistance; **TG**, triglyceride; **NEFA**, non-esterified fatty acids; **GPX2**, glutathione peroxidase 2; **HO1**, heme oxygenase-1; **GCLM**, glutamate-cysteine ligase modifier subunit; **mnSOD**, manganese superoxide dismutase; **NQO1**, NAD (P) H: quinone oxidoreductase; **GCLC**, glutamate-cysteine ligase catalytic subunit.

**Table S2. Laboratory methods used in the study**

| <b>Name</b>  | <b>Method</b>                                           |
|--------------|---------------------------------------------------------|
| AST          | Japan Society of Clinical Chemistry transferable method |
| ALT          | Japan Society of Clinical Chemistry transferable method |
| $\gamma$ -GT | Japan Society of Clinical Chemistry transferable method |
| FPI          | Chemiluminescent immunoassay method                     |
| Ferritin     | Chemiluminescent immunoassay method                     |
| FPG          | Enzymatic colorimetric method                           |
| TG           | Enzymatic method                                        |
| NEFA         | Enzymatic method                                        |

**AST**, aspartate aminotransferase; **ALT**, alanine aminotransferase;  **$\gamma$ -GT**, gamma-glutamyl transpeptidase; **FPI**, fasting plasma insulin; **FPG**, fasting plasma glucose; **TG**, triglyceride; **NEFA**, non-esterified fatty acids.

**Table S3. Commercial enzyme-linked immunosorbent assay and electrochemiluminescence kits used in the study**

| <b>Name</b>            | <b>Manufacturer</b>                     |
|------------------------|-----------------------------------------|
| TBARS                  | Cayman Chemical, Ann Arbor, USA         |
| IL-6                   | R&D Systems, Minneapolis, USA           |
| Leptin                 | R&D Systems, Minneapolis, USA           |
| FGF-21                 | R&D Systems, Minneapolis, USA           |
| Fetuin-A               | R&D Systems, Minneapolis, USA           |
| SPARC                  | R&D Systems, Minneapolis, USA           |
| BDNF                   | R&D Systems, Minneapolis, USA           |
| Follistatin            | R&D Systems, Minneapolis, USA           |
| M30                    | Peviva AB, Bromma, Sweden               |
| Adiponectin            | Sekisui Medical, Tokyo, Japan           |
| Se-P                   | Cusabio Biotech, Wuhan China            |
| Myostatin              | Cusabio Biotech, Wuhan China            |
| ANFPTL6                | Biovision, Milpitas, USA                |
| Decorin                | Aviscera Bioscience, Santa Clara, USA   |
| WFA <sup>+</sup> -M2BP | Immuno-Biological Lab, Kunma, Japan     |
| Fetuin-A               | BioVender Lab Med, Brno, Czech Republic |

**TBARS**, thiobarbituric acid-reactive substances; **IL-6**, interleukin 6; **FGF-21**, fibroblast growth factor 21; **SPARC**, secreted protein acidic and rich in cysteine; **BDNF**, brain-derived neurotrophic factor; **Se-P**, selenoprotein-P; **ANGPTL6**, angiopoietin-like 6; **WFA<sup>+</sup>-M2BP**, *Wisteria floribunda* agglutinin-positive human Mac-2 binding protein.



**Table S4. Primers used for quantitative real-time PCR**

| <b>Gene name</b> | <b>Forward</b>                 | <b>Reverse</b>                 |
|------------------|--------------------------------|--------------------------------|
| <i>GAPDH</i>     | 5'AGGTGAAGGTCGGAGTCA3'         | 5'GGTCATTGATGGCAACAA3'         |
| <i>HO1</i>       | 5'CCAGGCAGAGAATGCTGAGT3'       | 5'GTAGACAGGGGCGAAGACTG3'       |
| Catalase         | 5'ACCAGGGCATCAAAACCTTT3'       | 5'CCGGATGCCATAGTCAGGAT3'       |
| <i>GCLM</i>      | 5'GAAGAAGATATTTTCCTGTCATTGAT3' | 5'CCATTCATGTATTGAAGAGTGAATTT3' |
| <i>NQO1</i>      | 5'CTGATCGTACTGGCTCACTC3'       | 5'AACAGACTCGGCAGGATAC3'        |
| <i>GPx2</i>      | 5'ACAACCACCCGGGACTTCA3'        | 5'CCAAATTGGTTGCAAGGGAA3'       |
| <i>GCLC</i>      | 5'ATTCCTGACATTCAAGCGCAC3'      | 5'TTCCTCTACTTTTCACAATGACCGA3'  |
| <i>mnSOD</i>     | 5'GGGTTGGCTTGGTTTCAATA3'       | 5'CTGATTGGACAAGCAGCAA3'        |

***GAPDH***, glyceraldehyde 3-phosphate dehydrogenase; ***HO1***, heme oxygenase-1; ***GCLM***, glutamate-cysteine ligase modifier subunit; ***NQO1***, NAD(P)H: quinone oxidoreductase; ***GPX2***, glutathione peroxidase 2; ***GCLC***, glutamate-cysteine ligase catalytic subunit; ***mnSOD***, manganese superoxide dismutase
