# Supplementary material for: Weight-loss-independent benefits of exercise on liver steatosis and stiffness in Japanese men with NAFLD
Source: PubMed Central journal article supplement (PMC8059085; doi:10.1016/j.jhepr.2021.100253), 2021-02-10
Supplement: mmc2.pdf [file mmc2.pdf]

## JHEP Reports

### CTAT methods

Tables for a “Complete, Transparent, Accurate and Timely account” (CTAT) are now mandatory for all revised submissions. The aim is to enhance the reproducibility of methods.

- Only include the parts relevant to your study
- Refer to the CTAT in the main text as ‘Supplementary CTAT Table’
- Do not add subheadings
- Add as many rows as needed to include all information
- Only include one item per row

If the CTAT form is not relevant to your study, please outline the reasons why:

|  |
|--|
|  |
|--|

#### 1.1 Antibodies

| Name | Citation | Supplier | Cat no. | Clone no. |
|------|----------|----------|---------|-----------|
|      |          |          |         |           |

#### 1.2 Cell lines

| Name | Citation | Supplier | Cat no. | Passage no. | Authentication test method |
|------|----------|----------|---------|-------------|----------------------------|
|      |          |          |         |             |                            |

#### 1.3 Organisms

| Name | Citation | Supplier | Strain | Sex | Age | Overall n number |
|------|----------|----------|--------|-----|-----|------------------|
|      |          |          |        |     |     |                  |

#### 1.4 Sequence based reagents

| Name             | Sequence                         | Supplier      |
|------------------|----------------------------------|---------------|
| HO-1 Forward     | 5'-CCAGGCAGAGAATGCTGAGT-3'       | Sigma-Aldrich |
| HO-1 Reverse     | 5'-GTAGACAGGGGCGAAGACTG-3'       | Sigma-Aldrich |
| Catalase Forward | 5'- ACCAGGGCATCAAACCTTT-3'       | Sigma-Aldrich |
| Catalase Reverse | 5'-CCGGATGCCATAGTCAGGAT-3'       | Sigma-Aldrich |
| GCLM Forward     | 5'-GAAGAAGATATTTTTCTGTCATTGAT-3' | Sigma-Aldrich |
| GCLM Reverse     | 5'-CCATTCATGTATTGAAGAGTGAATTT-3' | Sigma-Aldrich |
| NQO1 Forward     | 5' -CTGATCGTACTGGCTCACTC-3'      | Sigma-Aldrich |
| NQO1 Reverse     | 5'-AACAGACTCGGCAGGATAC-3'        | Sigma-Aldrich |
| GPx Forward      | 5'-ACAACCACCCGGGACTTCA-3'        | Sigma-Aldrich |
| GPx Reverse      | 5'-CCAAATTGGTTGCAAGGGAA-3'       | Sigma-Aldrich |
| GCLC Forward     | 5'-ATTCCTGACATTCAAGCGCAC-3'      | Sigma-Aldrich |
| GCLC Reverse     | 5'-TTCCTCTACTTTTACAATGACCGA-3'   | Sigma-Aldrich |
| mnSOD Forward    | 5'-GGGTTGGCTTGGTTTCAATA-3'       | Sigma-Aldrich |
| mnSOD Reverse    | 5'-CTGATTTGGACAAGCAGCAA-3'       | Sigma-Aldrich |
| GAPDH Forward    | 5'-AGGTGAAGGTCGGAGTCA-3'         | Sigma-Aldrich |
| GAPDH Reverse    | 5'-GGTCATTGATGGCAACAA-3'         | Sigma-Aldrich |

## 1.5 Biological samples

| Description | Source | Identifier |
|-------------|--------|------------|
|             |        |            |

## 1.6 Deposited data

| Name of repository | Identifier | Link |
|--------------------|------------|------|
|                    |            |      |

## 1.7 Software

| Software name  | Manufacturer             | Version |
|----------------|--------------------------|---------|
| SPSS           | IBM, Armonk, NY, USA     | 25.0    |
| Excel Eiyō-Kun | Kenpakusya, Tokyo, Japan | 4.0     |

## 1.8 Other (e.g. drugs, proteins, vectors etc.)

|  |  |  |
|--|--|--|
|  |  |  |
|  |  |  |

## 1.9 Please provide the details of the corresponding methods author for the manuscript:

|                                                                                                                                                                                                                |
|----------------------------------------------------------------------------------------------------------------------------------------------------------------------------------------------------------------|
| Sechang Oh, Ph.D.<br>Faculty of Medicine, University of Tsukuba, 1-1-1 Tennodai, Tsukuba, Ibaraki 305-8575,<br>Japan<br>Phone: (+81) 29 853 3291; Fax: (+81) 29 853 3291<br>E-mail: ohsechang@md.tsukuba.ac.jp |
|----------------------------------------------------------------------------------------------------------------------------------------------------------------------------------------------------------------|

## 2.0 Please confirm for randomised controlled trials all versions of the clinical protocol are included in the submission. These will be published online as supplementary information.

|     |
|-----|
| N/A |
|-----|
